# Supplementary material
Source: publisher site journal article supplement (https://www.dovepress.com/article/469592)
Supplement: Supplementary file 1 [file get_supplementary_file.php]

**Index:**

**Skin Surgery Videographic Contents Evaluation Tool (SSVC-ET)**

Domain 1: is the video reliable?

**1. Clear aim.**

*Hint: clear indication at the beginning or at the description of the* ***video*** *of:*

** Name of the procedure * Pathology treated * Targeted audience.*

| No |  | Partial |  | Yes |
| --- | --- | --- | --- | --- |
| 1 | 2 | 3 | 4 | 5 |

**2. Aim accomplishment.**

*Hint: To obtain a score of 5, all the items must be present.*

| No |  | Partial |  | Yes |
| --- | --- | --- | --- | --- |
| 1 | 2 | 3 | 4 | 5 |

1. English **audio or written commentary** with the elaborative presentation of the procedure.
2. **Additional educational content,** such as diagrams, photos, and tables, was included to demonstrate the anatomical landmarks and relevant or unexpected findings.
3. **Good image quality**. When a low-definition or inadequate field of vision is present for a substantial part of the video duration, the video must be rejected.
4. The video should play at 1x speed.

**3. Validity of the video content.**

*Hint: To obtain a score of 5, all the items must be present.*

1. *The video addresses the* ***questions that viewers might ask in regard to the steps or procedures alternatives.***
2. **The site of the procedure** should be demonstrated.
3. The description of the **specific equipment** needed for the procedure was ensured.
4. It is essential to visualize the surgical procedure in a **systematic step-by-step** sequence**.**
5. It is important to emphasize the **intraoperative findings** and constantly refer to the anatomy.
6. Elaboration of any additional maneuvers to face ‘‘**progression failure** of the procedure’’.
7. **The expected outcomes of the procedure**, including operating time, cosmesis with a picture of the healed wounds, and postoperative morbidity, are presented.

| No |  | Partial |  | Yes |
| --- | --- | --- | --- | --- |
| 1 | 2 | 3 | 4 | 5 |

**4. Clear quotation of the sources of information that were used to redraft the video (other than the author or producer)?**

*Hint:*

** Clear indication that* ***the main claims*** *or statements made about the procedure are brought up by* ***a reference*** *used as evidence (e.g., a research study or expert opinion)*

** Reliable method for checking the sources used, such as a* ***bibliography/reference*** *or* ***the experts' organizations*** *quoted*

**Rating note: To score a complete ‘5’, the publication should fulfill both hints.**

| No |  | Partial |  | Yes |
| --- | --- | --- | --- | --- |
| 1 | 2 | 3 | 4 | 5 |

**5. Age of the information used in the video.**

*Hint:*

** When were the primary sources of information used to compile the video published?*

** Date of any revisions of the video (but not dates of reload)*

| No |  | Partial |  | Yes |
| --- | --- | --- | --- | --- |
| 1 | 2 | 3 | 4 | 5 |

**6. Balanced, unbiased source of information.**

- *Hint: Look for
  * Is the video produced from a personal or an objective point of view?*

** Evidence that more than one source of information was used to compile the video (e.g.,* ***more than one research study*** *or expert)
* evidence of an* ***external assessment*** *of the video content.*

- *Be* ***wary*** *if*

** The video* ***focuses on the advantages or disadvantages of one particular approach******without reference to other*** *possible approaches
* The video* ***relies mainly on evidence from single cases*** ** The information is presented in an advertising,* ***emotive or alarmist way***

| No |  | Partial |  | Yes |
| --- | --- | --- | --- | --- |
| 1 | 2 | 3 | 4 | 5 |

**7. Details of additional sources of evidence and information.**

*Hint: We look for suggestions for further reading, providing advice and* ***information about the procedure*** *and* ***technical procedural variations.***

| No |  | Partial |  | Yes |
| --- | --- | --- | --- | --- |
| 1 | 2 | 3 | 4 | 5 |

**8. Areas of uncertainty.**

*Hint:

* Look for discussion of the gaps in knowledge or differences in expert opinion concerning* ***procedure steps*** ** Be* ***wary*** *if the video implies* ***that the steps work for each patient or each location in the same way, e.g., level of undermining, type of instruments used, types of sutures, suturing techniques, etc.***

| No |  | Partial |  | Yes |
| --- | --- | --- | --- | --- |
| 1 | 2 | 3 | 4 | 5 |

**Domain 2**
HOW GOOD IS THE QUALITY OF INFORMATION ON PROCEDURE STEPS?

**9. Technical significance of the procedure steps.**

*Hint: Look for a description of how each step acts on the overall procedure.****Importance of the steps, e.g., special maneuvers that alter final results such as dog ear prevention during ellipse design and instrument handling techniques. etc.***

| No |  | Partial |  | Yes |
| --- | --- | --- | --- | --- |
| 1 | 2 | 3 | 4 | 5 |

**10. Procedure steps medical significance.**

- *Hint: Benefits can include* **controlling the disease, preventing recurrence, and overall wound health (e.g., margin, undermining effect on the final wound, benefits of buried suture. etc.), both short and long term.**
- ** Description of the* **effect of each step on the postop period recovery and daily activities. For example, primary vs. secondary closure, simple closure vs. advanced flaps, hematoma formation if no proper bleeding control was taken. etc.**

| No |  | Partial |  | Yes |
| --- | --- | --- | --- | --- |
| 1 | 2 | 3 | 4 | 5 |

**11. The drawbacks associated with certain maneuvers.**

- *Hint: Risks can include side effects, complications, and adverse reactions to the procedure steps* **(e.g., hematoma, wound dehiscence. etc.)** *- both short-term and long-term*

| No |  | Partial |  | Yes |
| --- | --- | --- | --- | --- |
| 1 | 2 | 3 | 4 | 5 |

**12. The drawbacks of skipping specific steps.**

- *Hint: Look for a description of the benefits and risks of* ***skipping any part of the procedure* (e.g., no undermining, no primary closure. etc.).**

| No |  | Partial |  | Yes |
| --- | --- | --- | --- | --- |
| 1 | 2 | 3 | 4 | 5 |

**13. Is it clear that there may be more than one possible procedure technique?**

- *Hint: Look for * a description of who is most likely to take advantage of each step mentioned and under what conditions * suggestions of alternatives to consider*
- **For example, margin vs. no margin, changing the direction of the dog ear to a more feasible site (away from a free margin), primary vs. secondary closure, and type of suturing technique.**

| No |  | Partial |  | Yes |
| --- | --- | --- | --- | --- |
| 1 | 2 | 3 | 4 | 5 |

**Domain 3**

OVERALL RATING OF THE VIDEO

**14. Based on the answers to the above items, the overall quality of the video was rated as a source of information about learning the surgical technique:**

*****  Use the equation:

| Poor | Fair | Good | Very good | Excellent |
| --- | --- | --- | --- | --- |
| 1 | 2 | 3 | 4 | 5 |
